# Supplementary material for: Gamma-aminobutyric acid A receptors in Alzheimer's disease: highly localized remodeling of a complex and diverse signaling pathway
Source: PubMed Central journal article supplement — Neural Regen Res. 2018 Aug;13(8):1362–3. doi: 10.4103/1673-5374.235240 (PMC6108202; doi:10.4103/1673-5374.235240), 2018-08
Supplement: NRR-13-1362_Suppl1.pdf [file NRR-13-1362_Suppl1.pdf]

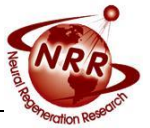

## PEER-REVIEW REPORT

**Name of journal:** Neural Regeneration Research

**Manuscript NO:** NRR-D-18-00217

**Title:** Gamma-aminobutyric acid A receptors in Alzheimer`s disease: highly localized remodeling of a complex and diverse signaling pathway

**Reviewer`s Name:** Dirk Montag

**Reviewer`s country:** Germany

**Date sent for review:** 2018-03-31

**Date reviewed:** 2018-04-12

**Review time:** 12Days

### COMMENTS TO AUTHORS

This review is very well written and interesting to read. The very complex expression patterns of GABA-A-receptors and the plasticity observed during Alzheimer's disease are very interesting and novel. The review appears timely and may point out some neglected aspects to better understand the complexity of molecular changes associated with Alzheimer's disease. I find nothing to criticize.
